# Supplementary material for: Viral Surrogates in Potable Reuse Applications: Evaluation of a Membrane Bioreactor and Full Advanced Treatment
Source: Atypon-hosted journal article supplement (doi:10.1061/(asce)ee.1943-7870.0001617), 2019-11-21
Supplement: supplemental_data_ee.1943-7870.0001617_pappa.pdf [file supplemental_data_ee.1943-7870.0001617_pappa.pdf]

## SUPPLEMENTAL DATA

*ASCE Journal of Environmental Engineering*

# Viral Surrogates in Potable Reuse Applications: Evaluation of a Membrane Bioreactor and Full Advanced Treatment

Katerina Pappa, Duane Moser, and Daniel Gerrity

**DOI:** 10.1061/(ASCE)EE.1943-7870.0001617

© ASCE 2019

[www.ascelibrary.org](http://www.ascelibrary.org)

*Submitted to the Journal of Environmental Engineering*

**Viral surrogates in potable reuse applications:  
Evaluation of a membrane bioreactor and full advanced treatment**

*Running title: Viral surrogates in potable reuse applications*

Katerina Papp<sup>a,b,c</sup>, Duane Moser<sup>b</sup>, Daniel Gerrity<sup>a,c\*</sup>

<sup>a</sup>Department of Civil and Environmental Engineering and Construction, University of Nevada,  
Las Vegas, Las Vegas, NV, USA

<sup>b</sup>Division of Hydrologic Sciences, Desert Research Institute, Las Vegas, NV, USA

<sup>c</sup>Applied Research and Development Center, Southern Nevada Water Authority, Las Vegas, NV,  
USA

\*Corresponding author: 4505 S. Maryland Parkway, Box 454015, Las Vegas, NV, 89154;  
Telephone: (702) 895-3955; Email: daniel.gerrity@unlv.edu **or** P.O. Box 99954, Las Vegas, NV  
89193; Telephone: (702) 856-3518; Email: daniel.gerrity@snwa.com.

**Figure S1.** Flow diagram of the full-scale membrane bioreactor (MBR) facility in Nevada. As denoted by the red stars, samples were collected after (1) fine screening (i.e., MBR feed) and (2) membrane filtration (i.e., MBR filtrate).

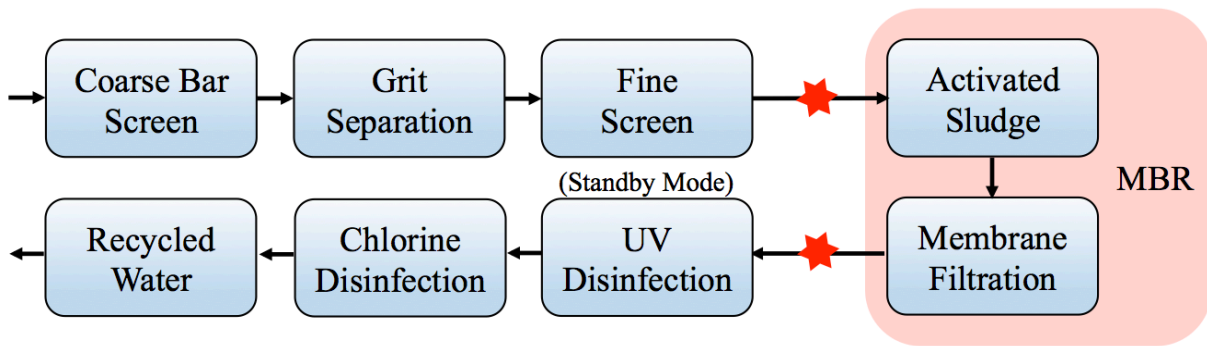

**Figure S2.** Flow diagram of the full-scale water reclamation facility and associated demonstration-scale potable reuse facility in California. As denoted by the red stars, samples were collected after (1) tertiary treatment at the full-scale water reclamation facility (i.e., demo feed), (2) ozonation, (3) biological activated carbon, (4) ultrafiltration, (5) reverse osmosis (as permeate), (6) reverse osmosis (as concentrate), and (7) the UV advanced oxidation process.

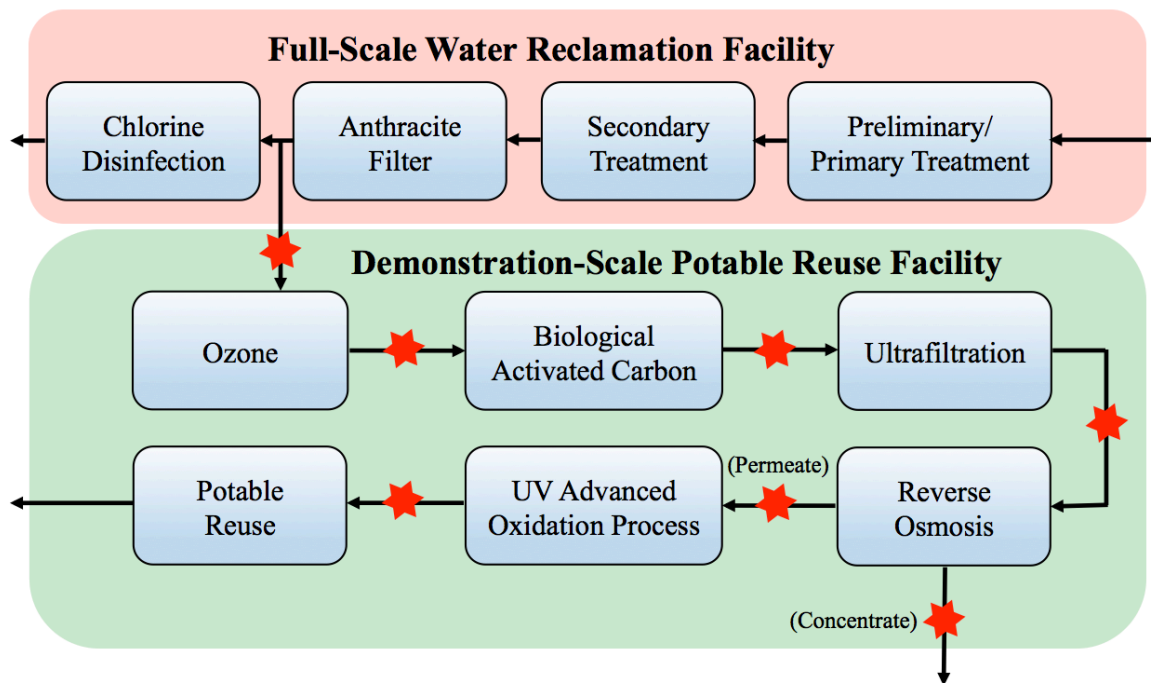

**Figure S3.** (Top) Gene block fragment serial dilutions used to develop the (bottom) standard curves for each assay. Data were omitted from the standard curves for inconsistent amplification, lack of amplification, or loss of linearity (i.e., plateauing). These standard curves were used to determine the limits of quantification (LoQs) for each qPCR assay (Table S4), as described in the main text. Similar standard curves were generated for independent qPCR runs.

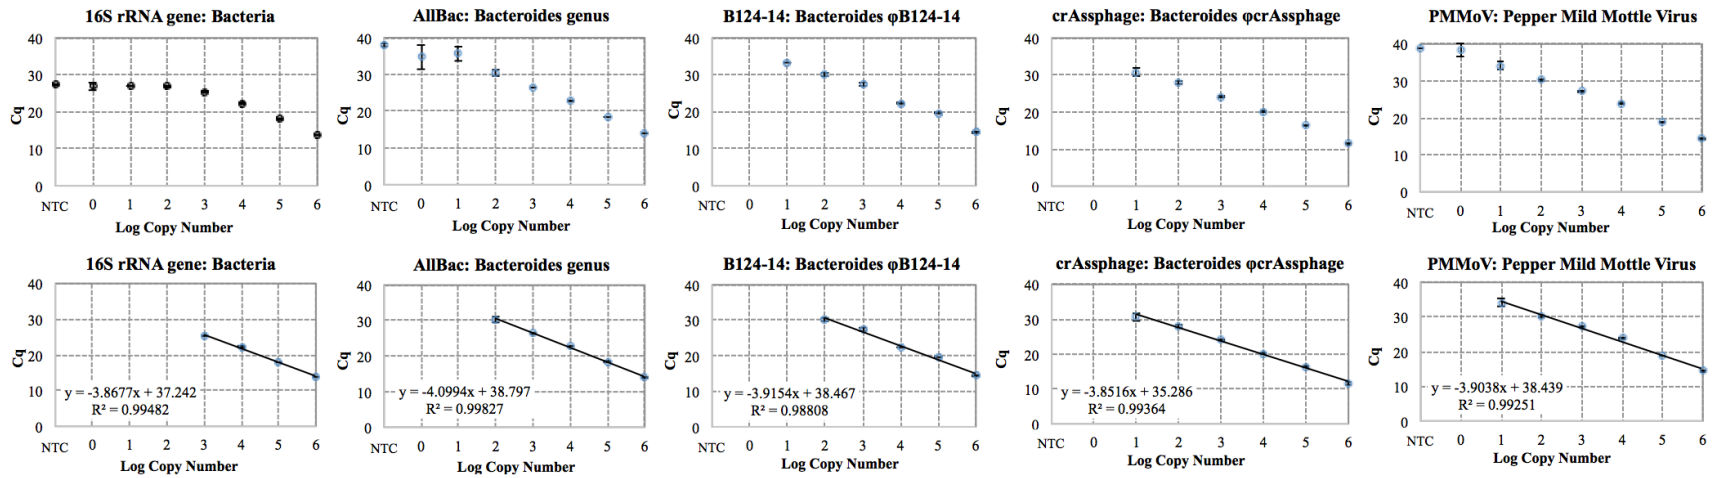

**Figure S4.** Correlation between the concentrations of (red)  $\phi$ B124-14 and (black)  $\phi$ crAssphage with host *Bacteroides* in the MBR feed collected in (top) April of 2018, (middle) June of 2018, and (bottom) all samples combined. One outlier was omitted from the  $\phi$ crAssphage dataset for April.

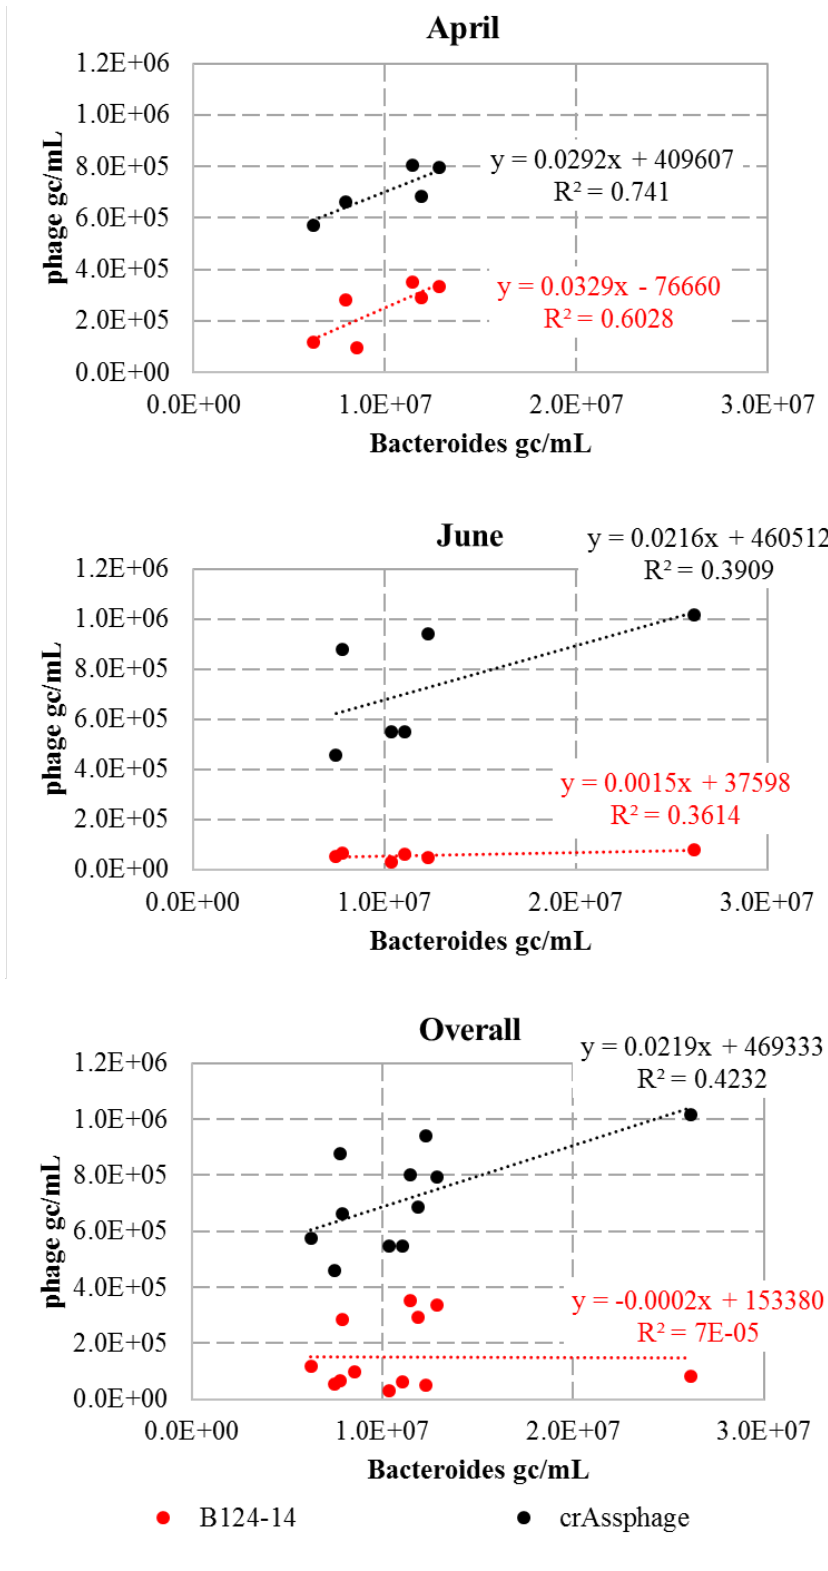

**Table S1.** List of manufacturer specifications and operational parameters for each treatment process at the MBR and FAT facilities.

| Facility | Process | Specifications/Operational Parameters                                                                                                                                                                                                                               |
|----------|---------|---------------------------------------------------------------------------------------------------------------------------------------------------------------------------------------------------------------------------------------------------------------------|
| MBR      | MBR     | Solids retention time = 8-10 days<br>Nitrification/partial denitrification<br>Model = ZeeWeed 500D<br>Material = Polyvinylidene difluoride (PVDF)<br>Pore size = 0.04 $\mu\text{m}^1$<br>Module surface area = 34 $\text{m}^2$<br>Flow configuration = Outside-in   |
| FAT      | Ozone   | Manufacturer = Wedeco<br>$\text{O}_3/\text{TOC} = 0.93$<br>CT = 1.5 mg-min/L                                                                                                                                                                                        |
|          | BAC     | GAC = Calgon Carbon F300<br>Condition = Exhausted toward TOC<br>Bed depth = 2 m<br>EBCT = 15 min                                                                                                                                                                    |
|          | UF      | Model = Toray HFU-2020<br>Material = Polyvinylidene difluoride (PVDF)<br>Pore size = 0.015 $\mu\text{m}$ / MWCO = 150 kDa<br>Module surface area = 72 $\text{m}^2$<br>Flow configuration = Outside-in<br>Flux > 85 $\text{L}/\text{m}^2\text{-h}$<br>Recovery > 95% |
|          | RO      | <u>Two-stage configuration:</u><br>Membrane Model = Hydranautics ESPA2 LD<br>Salt rejection = 99.6%<br><u>Three-stage configuration:</u><br>Membrane Model = Toray TML20-400<br>Salt rejection = 99.7%<br>Recovery = 75-80%                                         |
|          | UV AOP  | Model = Trojan UVPhox (low pressure UV)<br>System power = 18.0 kW<br>Electrical energy = 0.079 $\text{kWh}/\text{m}^3$<br>Hydrogen peroxide dose = 3 mg/L                                                                                                           |

<sup>1</sup>No molecular weight cutoff (MWCO) listed

**Table S2.** Summary of sample collection details for the full-scale MBR facility.

| Sample Location <sup>a</sup> | Collection Date | Collection Time | Number of Replicates | Procedure                                                                                                    |
|------------------------------|-----------------|-----------------|----------------------|--------------------------------------------------------------------------------------------------------------|
| MBR feed                     | April 24, 2018  | ~9:30 am        | 2                    | Each sample was collected directly into a 10-L Nalgene carboy at the facility's designated collection ports. |
| MBR filtrate                 | April 24, 2018  | ~9:50 am        | 2                    |                                                                                                              |
| MBR feed                     | June 05, 2018   | ~8:15 am        | 2                    |                                                                                                              |
| MBR filtrate                 | June 05, 2018   | ~8:35 am        | 2                    |                                                                                                              |
|                              |                 |                 |                      |                                                                                                              |

<sup>a</sup>See Figure S1 for depiction of sample locations

**Table S3.** Summary of sample collection details for the demonstration-scale FAT facility.

| Sample Location <sup>a</sup> | Collection Date | Collection Time | Number of Replicates | Procedure                                                                                                    |
|------------------------------|-----------------|-----------------|----------------------|--------------------------------------------------------------------------------------------------------------|
| Demo Feed                    |                 |                 | 2                    | Each sample was collected directly into a 10-L Nalgene carboy at the facility's designated collection ports. |
| Ozone Effluent               |                 |                 | 2                    |                                                                                                              |
| BAC Effluent                 |                 |                 | 2                    |                                                                                                              |
| UF Filtrate                  | July 10, 2018   | 9 am – 12 pm    | 2                    |                                                                                                              |
| RO Permeate                  |                 |                 | 2                    |                                                                                                              |
| RO Concentrate               |                 |                 | 2                    |                                                                                                              |
| UV AOP Effluent              |                 |                 | 2                    |                                                                                                              |

<sup>a</sup>See Figure S2 for depiction of sample locations

**Table S4.** Summary of limits of quantification (LoQs; gc/μL of template) for the qPCR assays in the current study. LoQs were calculated using two different approaches: (1) the U.S. Environmental Protection Agency approach with 99% confidence or (2) a standard t test approach with 95% confidence. Bold font indicates the LoQs that were actually selected for the current study.

| qPCR Assay    | LoQ <sup>a</sup> (gc/μL) | LoQ <sup>b</sup> (gc/μL) |
|---------------|--------------------------|--------------------------|
| 16S rRNA gene | <b>643</b>               | 157                      |
| AllBac        | 719                      | <b>175</b>               |
| B124-14       | 305                      | <b>75</b>                |
| crAssphage    | 11                       | <b>3</b>                 |
| PMMoV         | 30                       | <b>7</b>                 |

<sup>a</sup>MDL =  $t_s$  (99% confidence)

<sup>b</sup>MDL =  $t_s/\sqrt{N}$  (95% confidence)

**Table S5.** Human pathogen and coliphage occurrence at the MBR study site as part of a previous virus monitoring study. Adapted from Erdal and Vorheis (2015).

| <b>Virus in MBR Feed</b>  | <b>Units</b>      | <b>Normal Condition 1</b> | <b>Normal Condition 2</b> | <b>Cleaning w/ Hypochlorite</b> | <b>Cleaning w/ Citric Acid</b> | <b>Increased Flux</b> |
|---------------------------|-------------------|---------------------------|---------------------------|---------------------------------|--------------------------------|-----------------------|
| Adenovirus                | gc/mL             | 6.7E+02                   | 5.9E-01                   | 3.8E+04                         | 2.0E+00                        | 3.4E+02               |
| Norovirus GI              | gc/mL             | 8.1E+00                   | <1.0e-03                  | 1.0E+03                         | <1.0e-03                       | 1.3E+04               |
| Norovirus GII             | gc/mL             | 2.6E+01                   | <1.0e-03                  | 2.0E+02                         | <1.0e-03                       | 1.3E+01               |
| MS2 Coliphage             | PFU/mL            | 1.9E+01                   | 4.4E+01                   | 2.4E+01                         | 1.8E+01                        | 2.1E+01               |
| Somatic Coliphage         | PFU/mL            | 1.6E+01                   | 6.2E+01                   | 1.9E+01                         | 1.5E+01                        | 2.3E+01               |
| <b>Virus in Filtrate</b>  | <b>Units</b>      | <b>Normal Condition</b>   | <b>Normal Condition</b>   | <b>Cleaning w/ Hypochlorite</b> | <b>Cleaning w/ Citric Acid</b> | <b>Increased Flux</b> |
| Adenovirus                | gc/mL             | <5.0e-03                  | <1.0e-03                  | 1.0e-03                         | <1.0e-03                       | <1.0e-03              |
| Norovirus GI              | gc/mL             | <5.0e-03                  | <1.0e-03                  | <1.0e-03                        | <1.0e-03                       | <1.0e-03              |
| Norovirus GII             | gc/mL             | <5.0e-03                  | <1.0e-03                  | <1.0e-03                        | <1.0e-03                       | <1.0e-03              |
| MS2 Coliphage             | PFU/mL            | <1.0e-02                  | <1.0e-02                  | 5.0e-02                         | 2.1e-01                        | 4.0e-02               |
| Somatic Coliphage         | PFU/mL            | <1.0e-02                  | <1.0e-02                  | 3.0e-02                         | 7.0e-02                        | <1.0e-02              |
| <b>Log Removal Values</b> | <b>Units</b>      | <b>Normal Condition</b>   | <b>Normal Condition</b>   | <b>Cleaning w/ Hypochlorite</b> | <b>Cleaning w/ Citric Acid</b> | <b>Increased Flux</b> |
| Adenovirus                | Log <sub>10</sub> | >5.1                      | >2.8                      | 7.6                             | >3.3                           | >5.5                  |
| Norovirus GI              | Log <sub>10</sub> | >3.2                      | N/A                       | >6.0                            | N/A                            | >7.1                  |
| Norovirus GII             | Log <sub>10</sub> | >3.7                      | N/A                       | >5.3                            | N/A                            | >4.1                  |
| MS2 Coliphage             | Log <sub>10</sub> | >3.3                      | >3.6                      | 2.7                             | 1.9                            | 2.7                   |
| Somatic Coliphage         | Log <sub>10</sub> | >3.2                      | >3.8                      | 2.8                             | 2.3                            | >3.4                  |
